# Supplementary figures and images for: Examining the optimal cutoff values of HADS, PHQ‐9 and GAD‐7 as screening instruments for depression and anxiety in irritable bowel syndrome
Source: PubMed Central journal article supplement — Neurogastroenterol Motil. 2021 May 3;33(12):e14161. doi: 10.1111/nmo.14161 (PMC9285971; doi:10.1111/nmo.14161), 2021-05-03

Comparing HADS-D total score to PHQ-9 total score

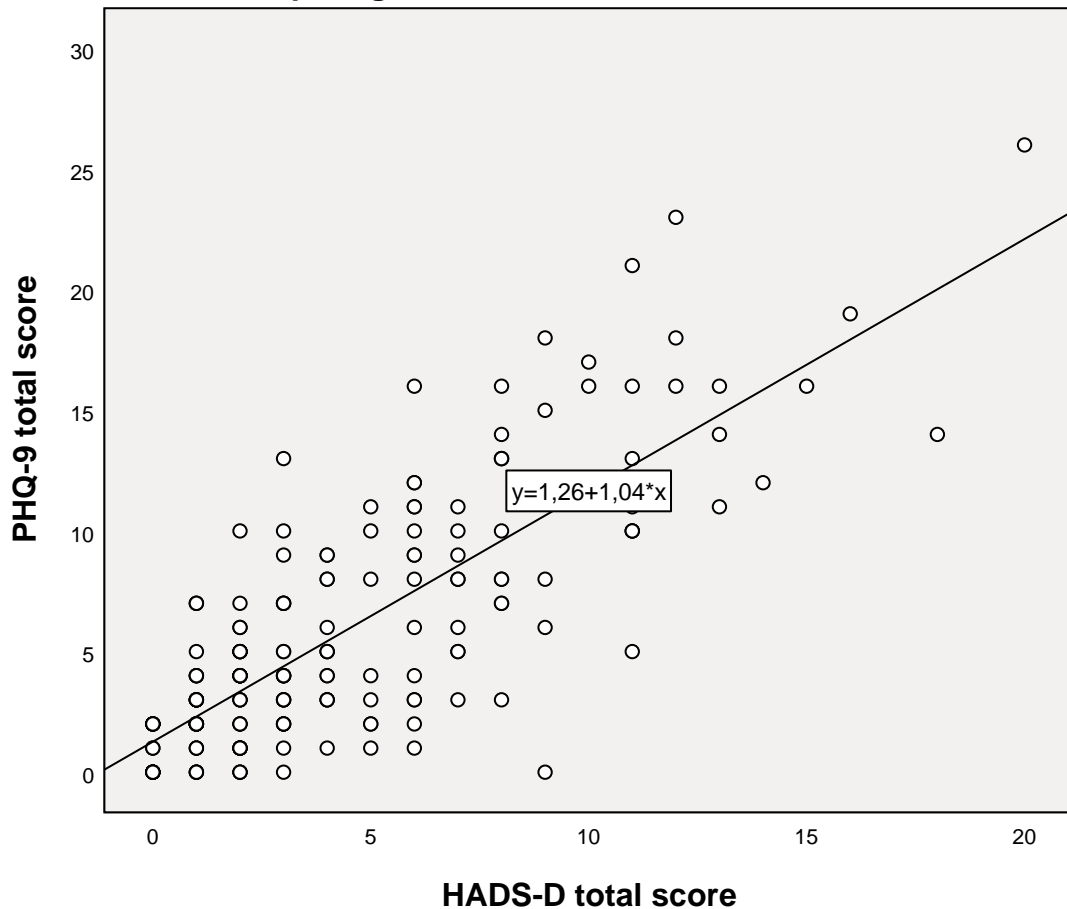

Supplement: NMO-33-0-s001.pdf [file NMO-33-0-s001.pdf]

# Comparing HADS-A total score to GAD-7 total score

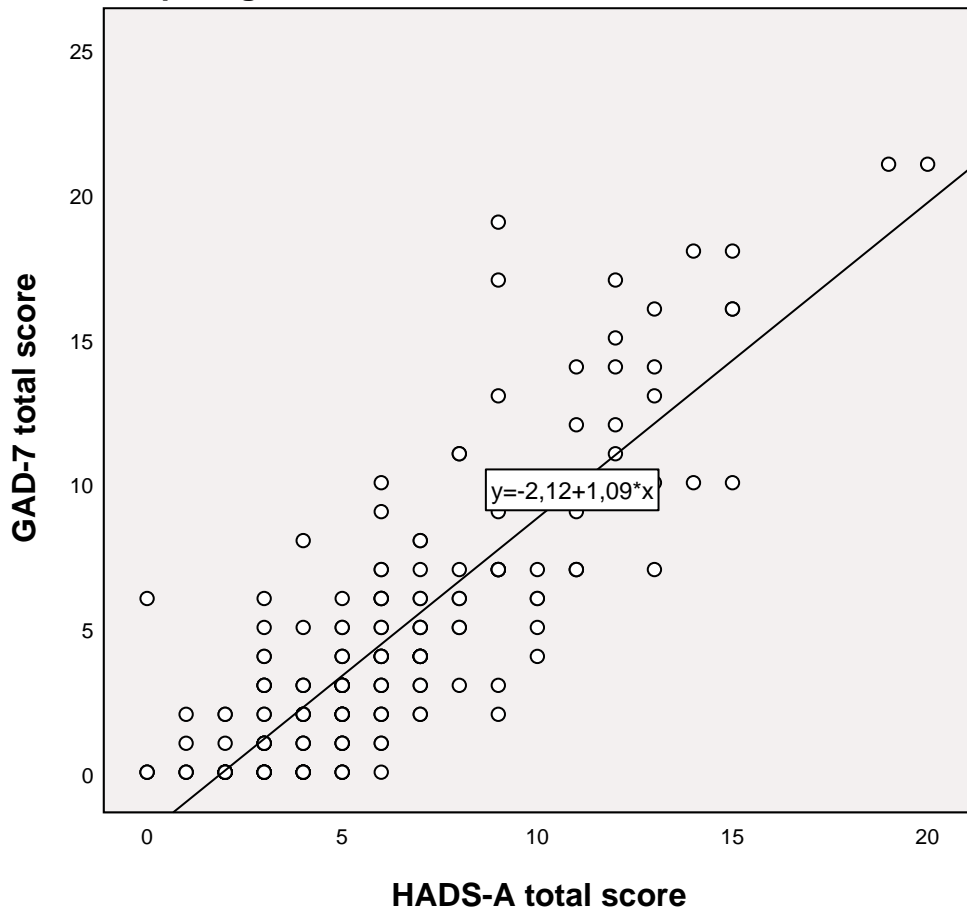

Supplement: NMO-33-0-s002.pdf [file NMO-33-0-s002.pdf]
